# Supplementary material for: Analysis of Metabolites in White Flowers of Magnolia Denudata Desr. and Violet Flowers of Magnolia Liliiflora Desr
Source: PubMed Central journal article supplement (PMC6100211; doi:10.3390/molecules23071558), 2018-06-27
Supplement: molecules-23-01558-s001.pdf [file molecules-23-01558-s001.pdf]

# Analysis of Metabolites in White Flowers of *Magnolia Denudata* Desr. and Violet Flowers of *Magnolia Liliiflora* Desr.

Chang Ha Park <sup>1</sup>, Soo-Yun Park <sup>2</sup>, Sook Young Lee <sup>3</sup>, Jae Kwang Kim <sup>4,\*</sup> and Sang Un Park <sup>1,\*</sup>

<sup>1</sup> Department of Crop Science, Chungnam National University, 99 Daehak-Ro, Yuseong-gu, Daejeon 34134, Korea; parkch804@gmail.com

<sup>2</sup> National Institute of Agricultural Sciences, Rural Development Administration, Wanju-gun, Jeonbuk 54875, Korea; psy22@korea.kr

<sup>3</sup> Regional Innovation Center for Dental Science & Engineering, Chosun University, 309 Pilmun-daero, Dong-gu, Gwangju 501-759, Korea; koreanseedbank@gmail.com

<sup>4</sup> Division of Life Sciences and Bio-Resource and Environmental Center, Incheon National University, Incheon 406-772, Korea

\* Correspondence: kjkpj@inu.ac.kr (J.K.K.); supark@cnu.ac.kr (S.U.P.); Tel.: +82-32-835-8241 (J.K.K.); +82-42-821-6730 (S.U.P.); Fax: +82-32-835-0763 (J.K.K.); +82-42-822-2631 (S.U.P.)

Received: 27 May 2018; Accepted: 21 June 2018; Published: date

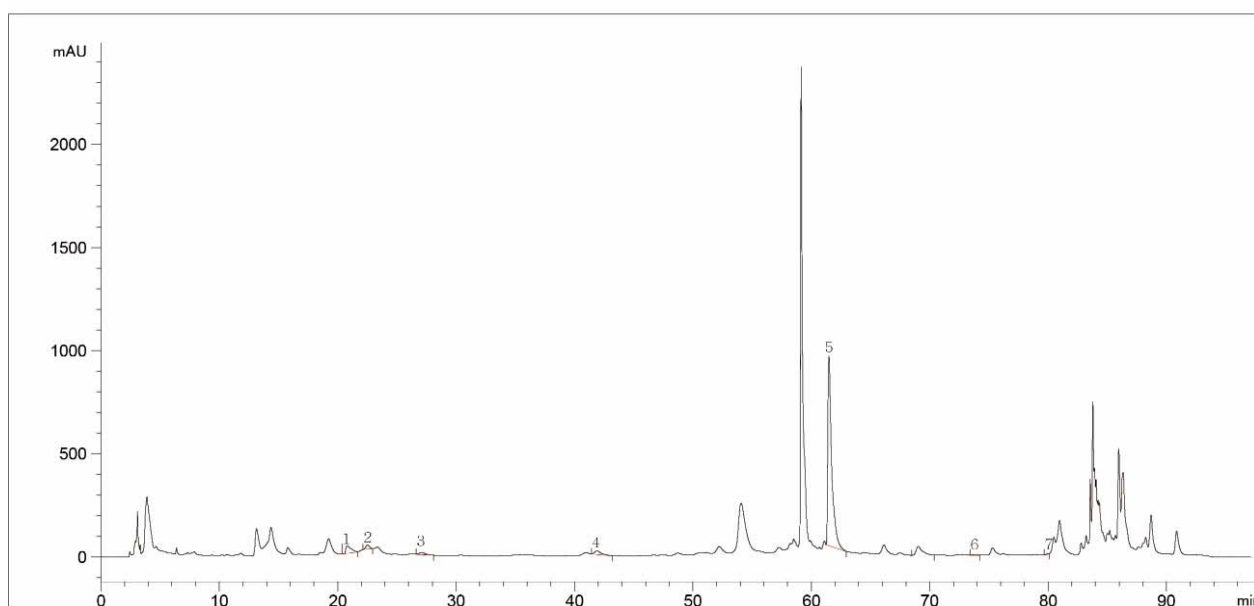

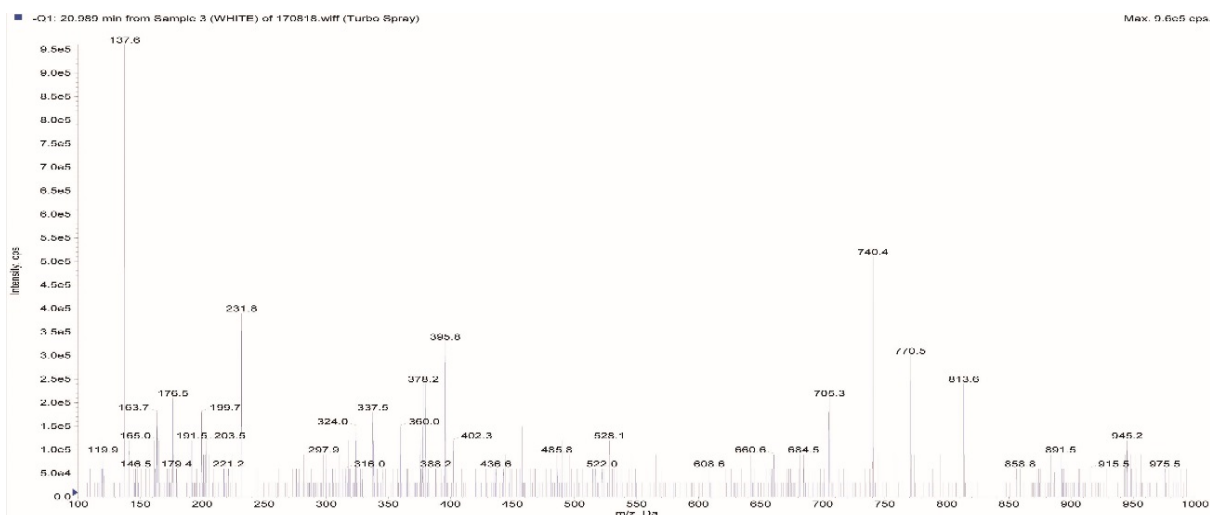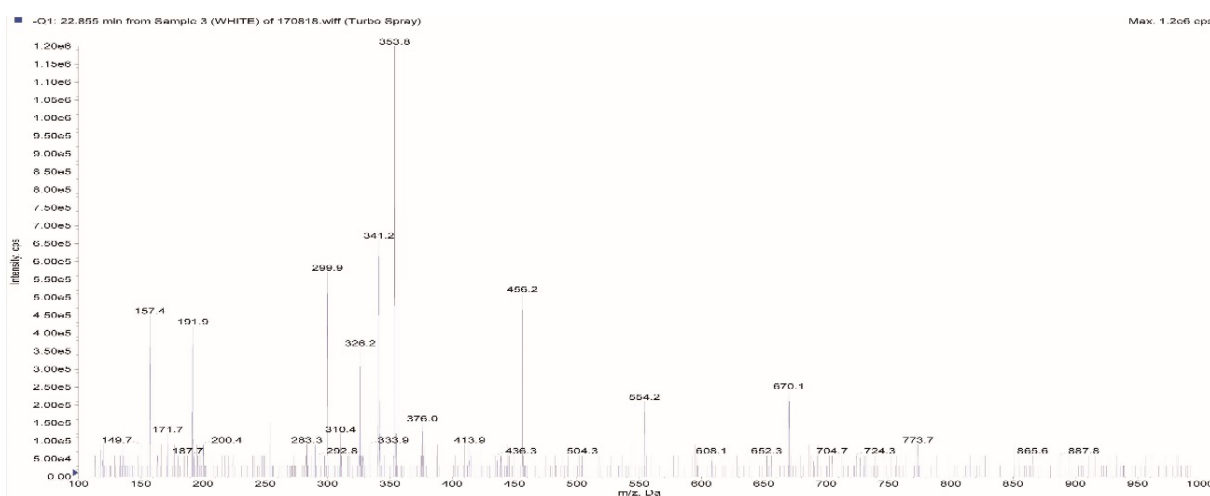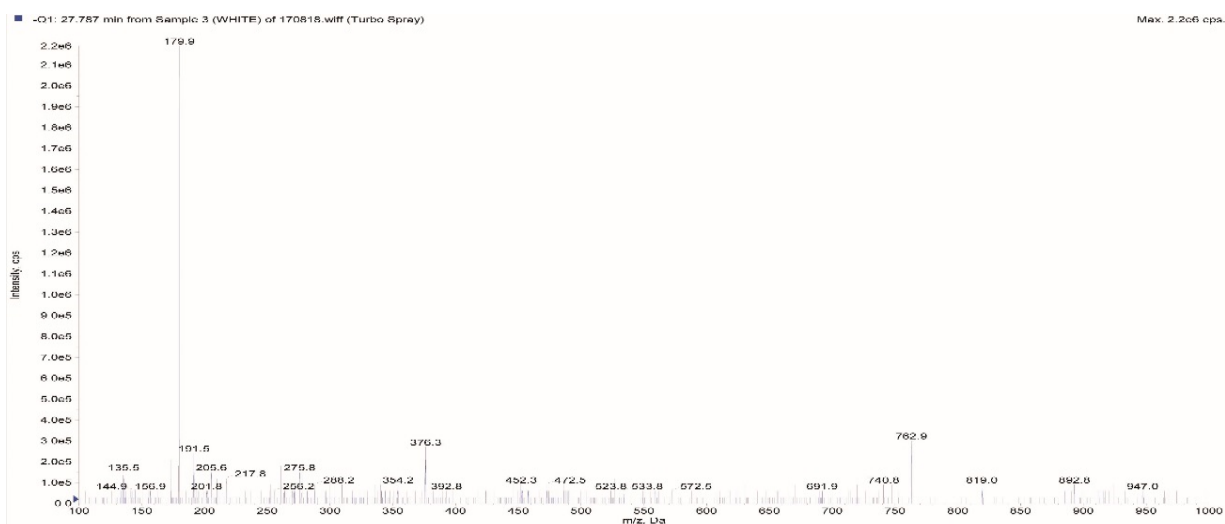

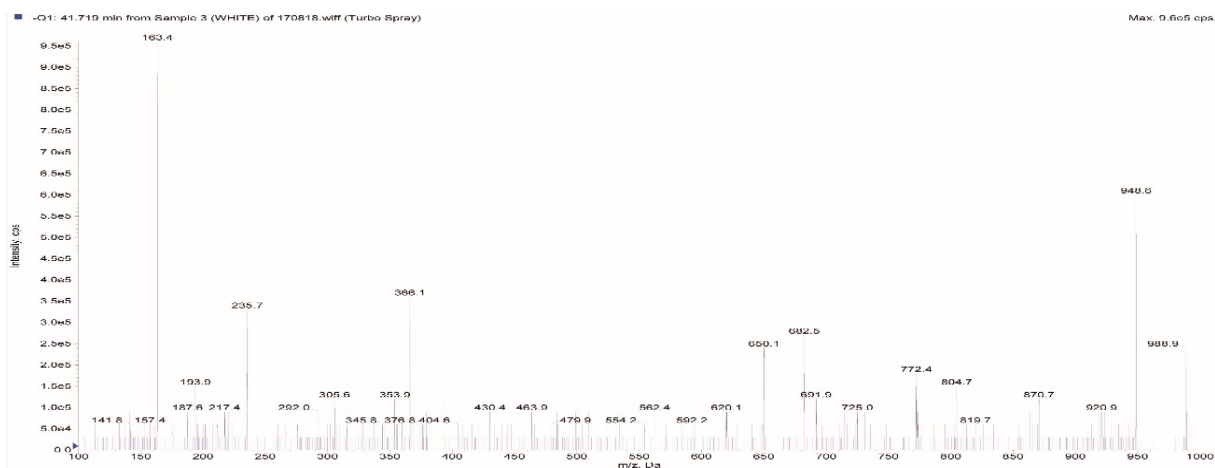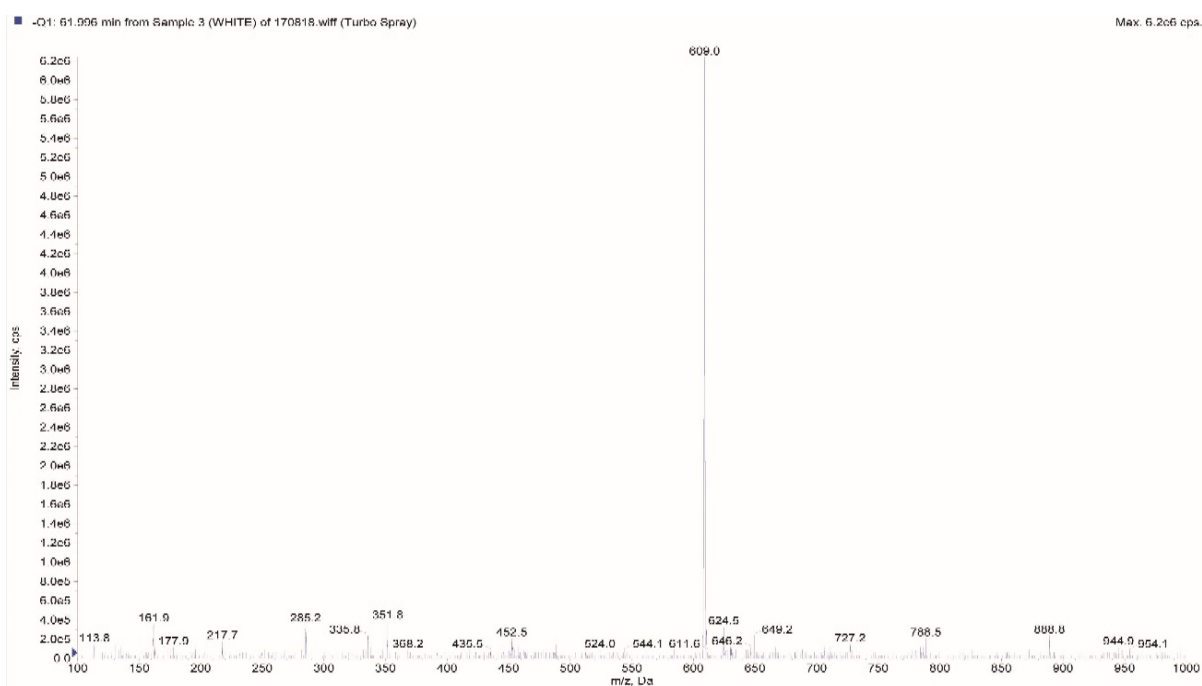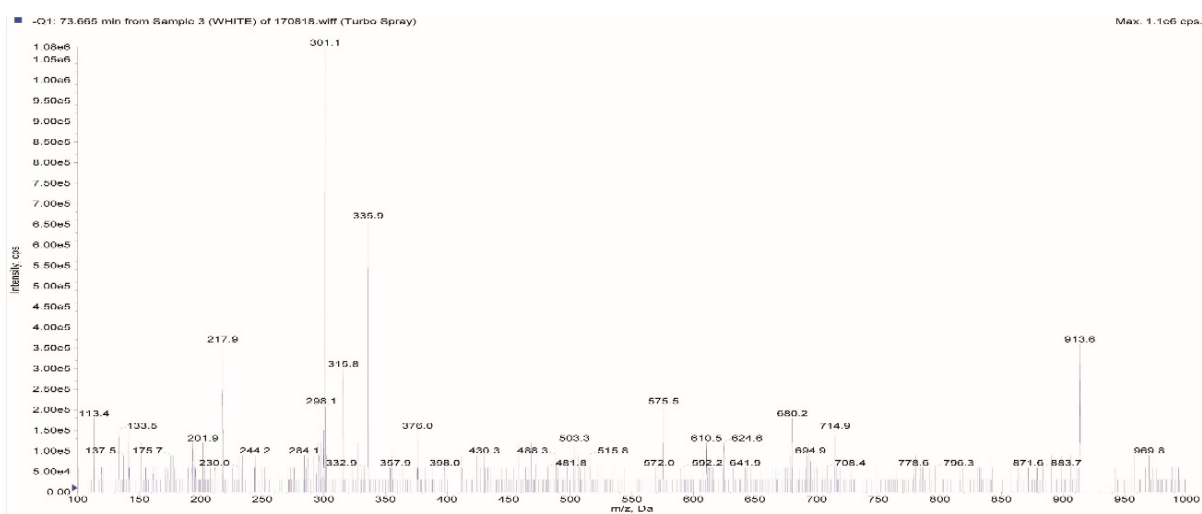

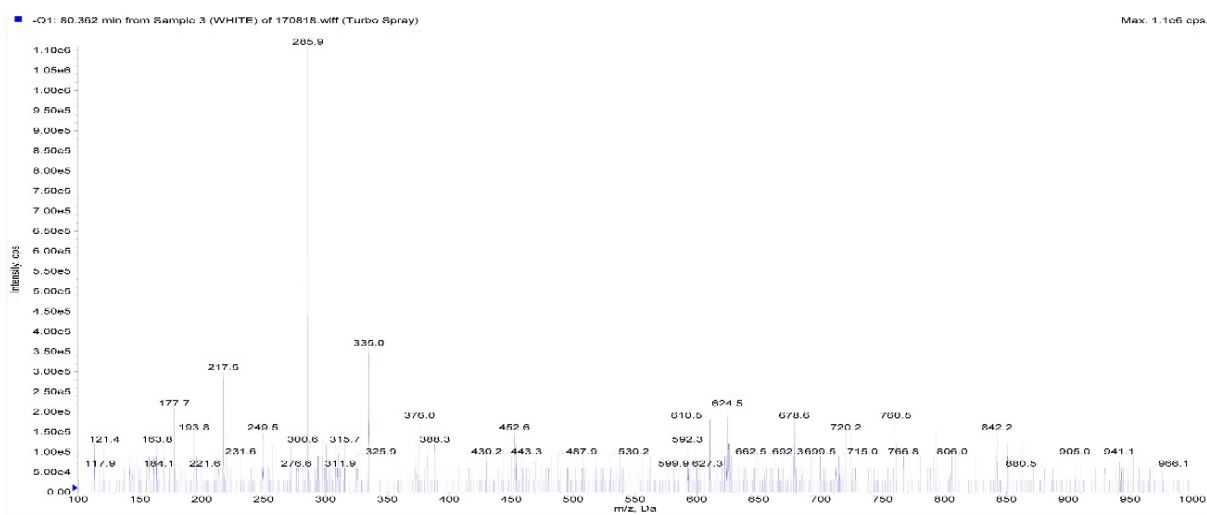

**Figure S1.** LC-MS spectrum of phenolic compounds identified in white flowers of *Magnolia denudate* Desr. 1, 4-hydroxybenzoic acid; 2, Chlorogenic acid; 3, Caffeic acid; 4, *p*-coumaric acid; 5, Rutin; 6, Quercetin; 7, Kaempferol.

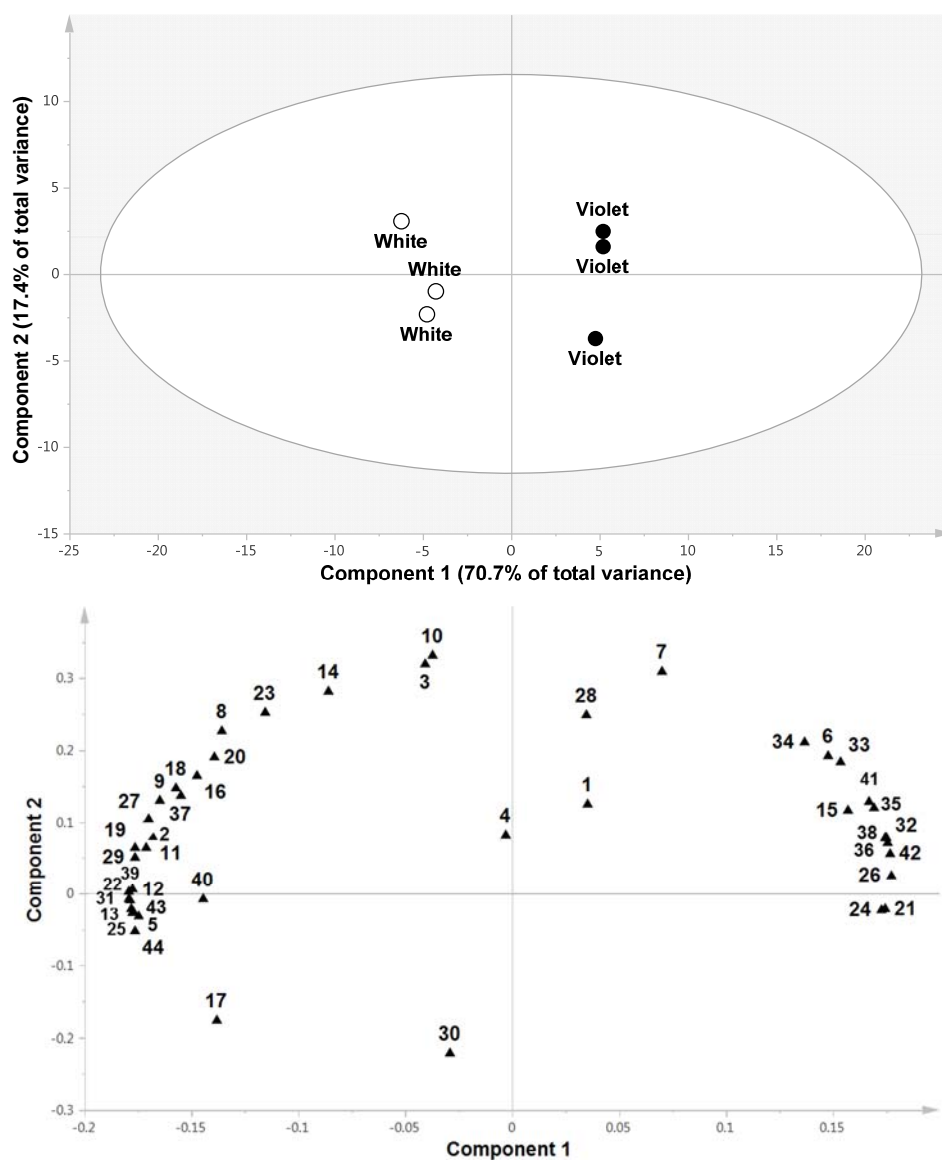

**Figure S2.** Scores and loading plots of principal components 1 and 2 of the PCA results obtained from polar metabolite data of white flowers of *M. denudate* and violet flowers of *M. liliiflora*. 1–44, the compounds listed in Table S1.

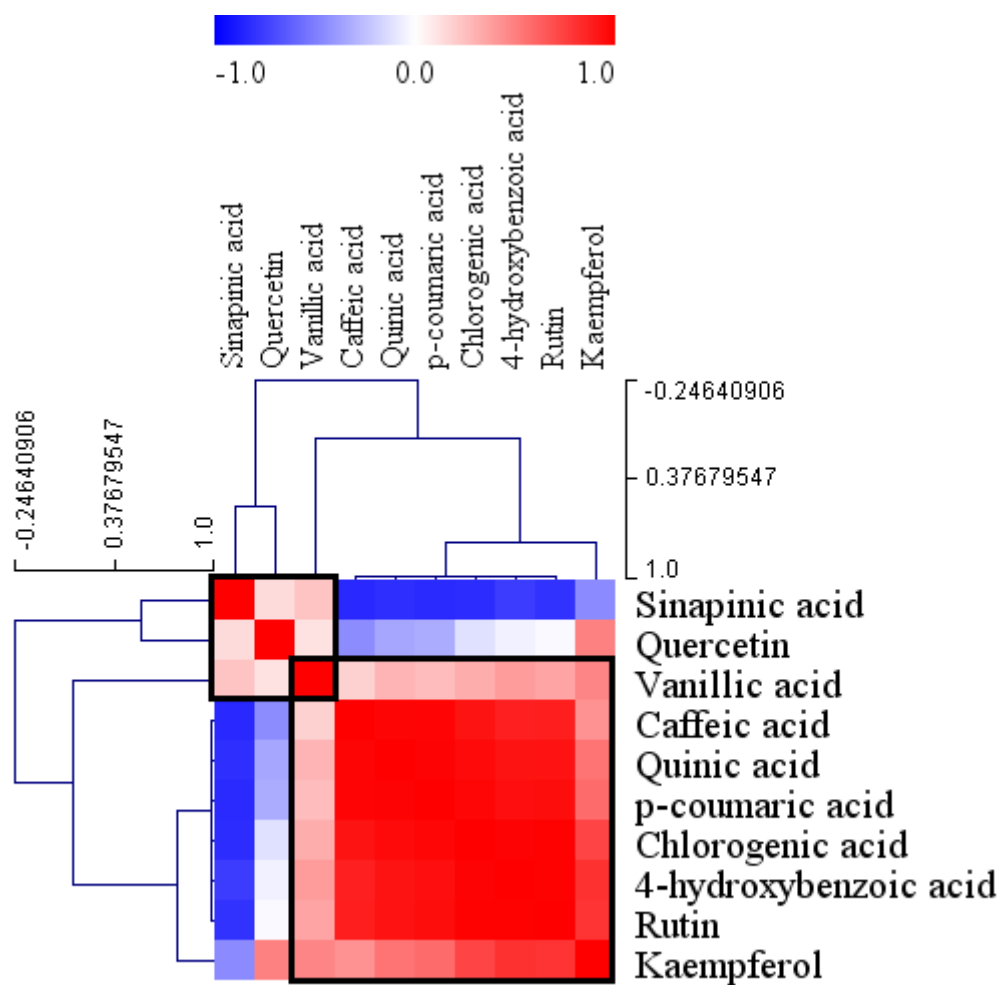

**Figure S3.** Correlation matrix of 10 phenolics from white flowers of *M. denudata* and violet flowers of *M. liliiflora*. Each square indicates the Pearson's correlation coefficient of a pair of compounds, with the correlation coefficient indicated by the intensity of the red and blue colors.

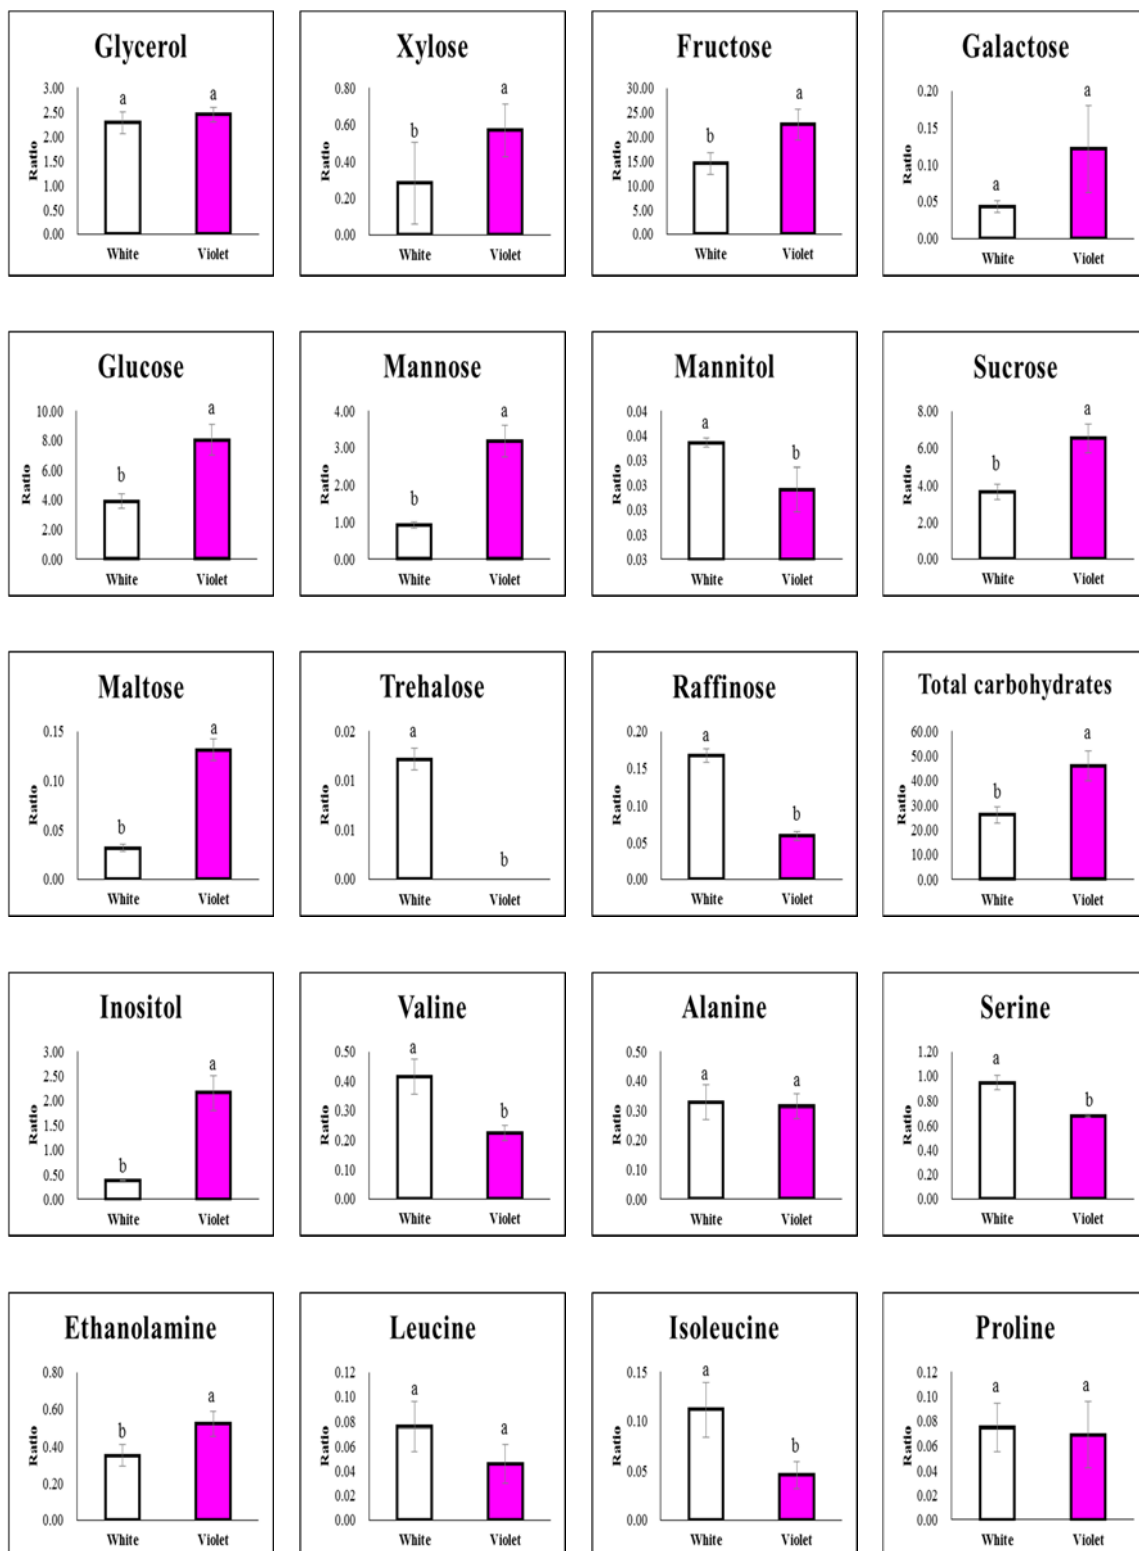

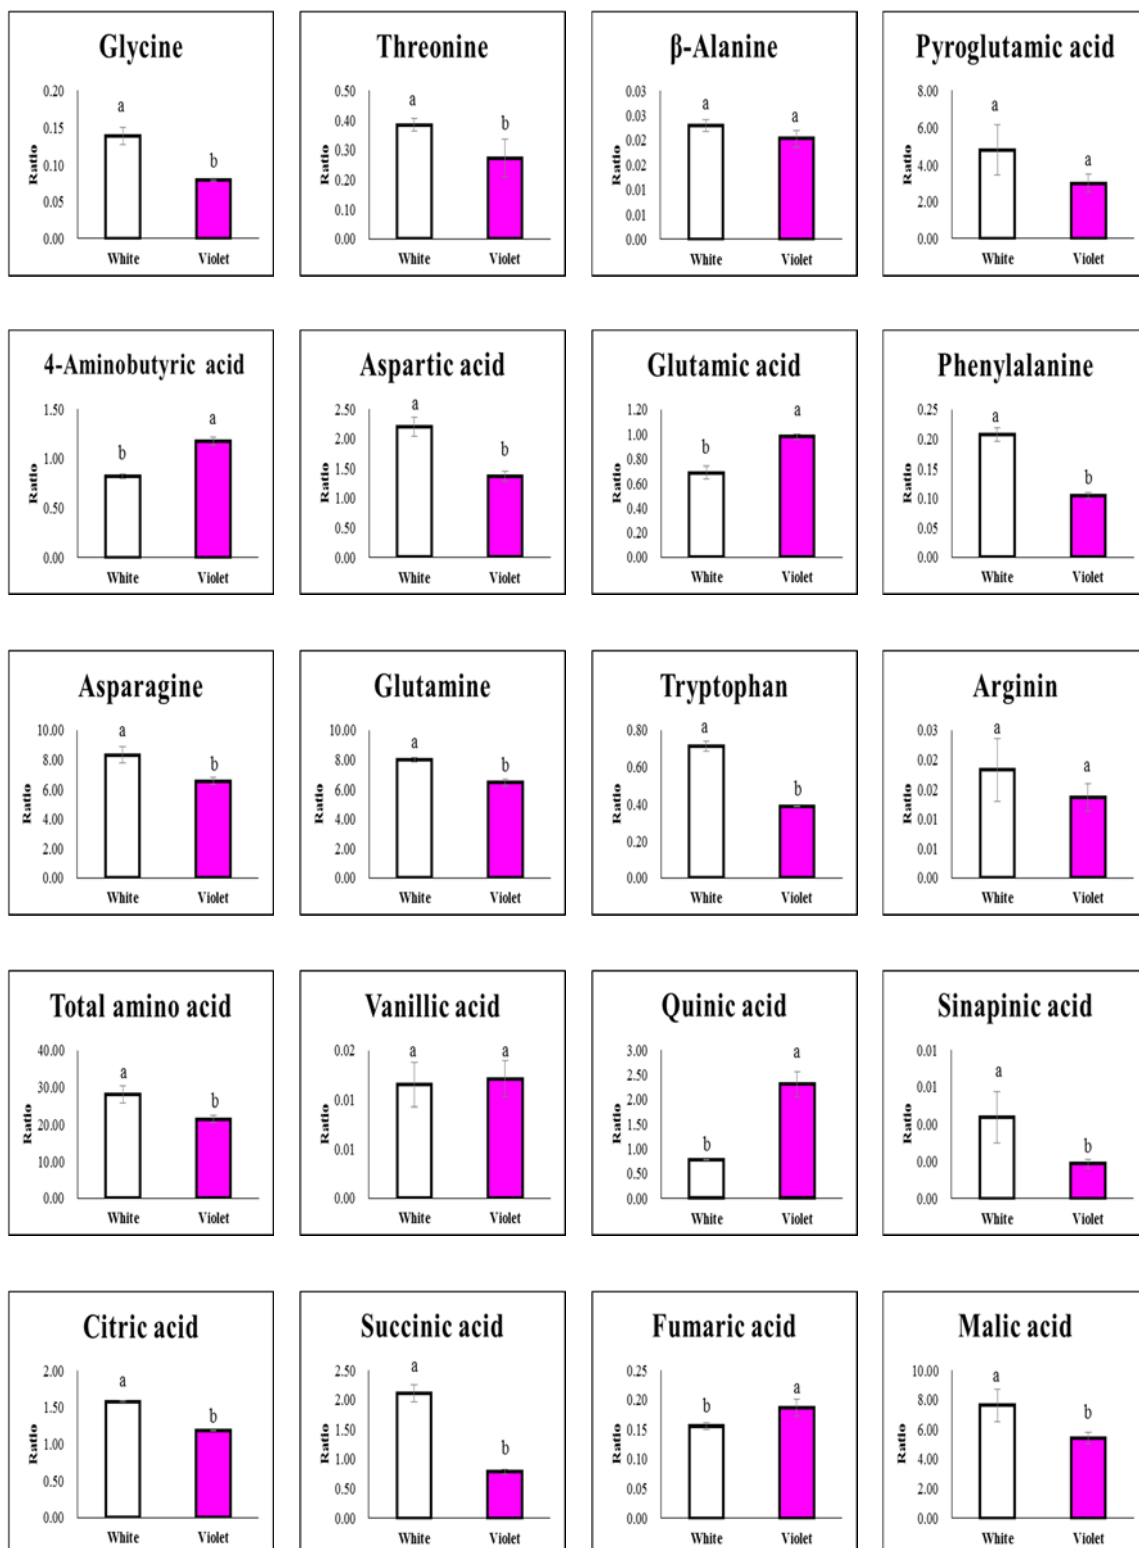



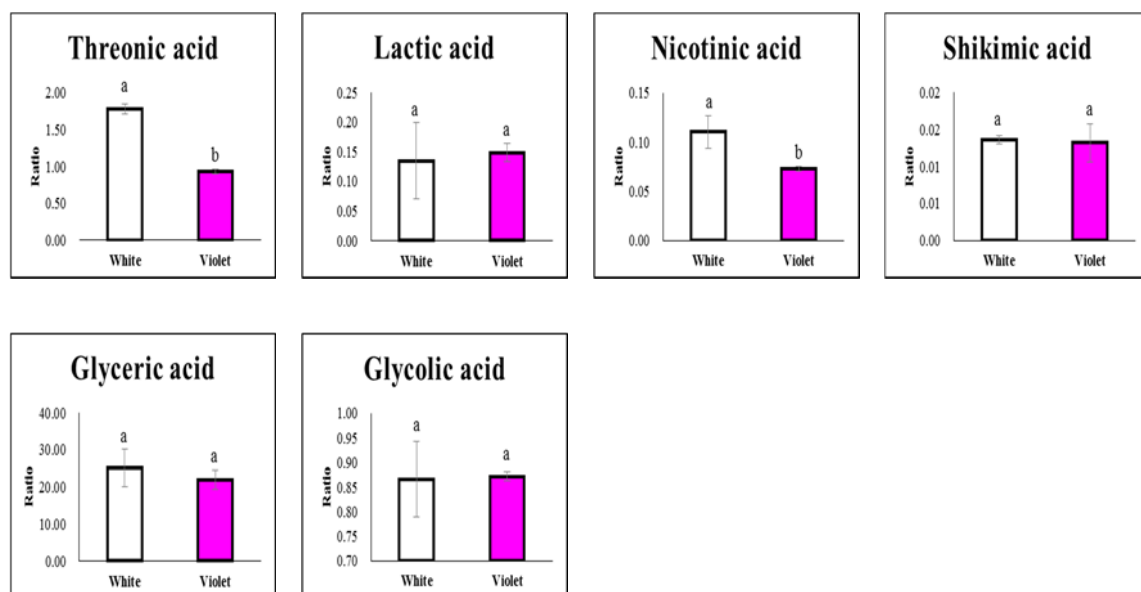

**Figure S4.** Metabolite peak height differences of white flowers of *Magnolia denudate* and violet flowers of *Magnolia liliiflora* based on Duncan's Multiple Range Test ( $p < 0.05$ ) using GC-TOFMS.

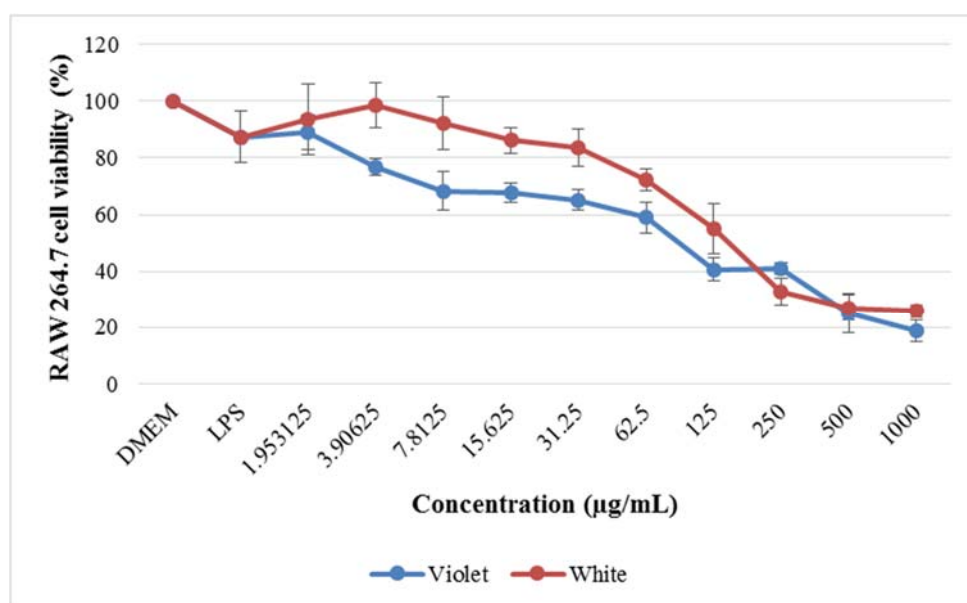

**Figure S5.** Effect of ethanol extracts from white and violet flowers, respectively, on the viability of RAW 264.7 cells. Cells were treated with different concentrations (1.953125 to 1,000 µg/mL) of extracts of white and violet flowers. Cell viability was measured by a 3-(4,5-dimethylthiazol-2-yl)-2,5-diphenyltetrazolium bromide (MTT) assay.

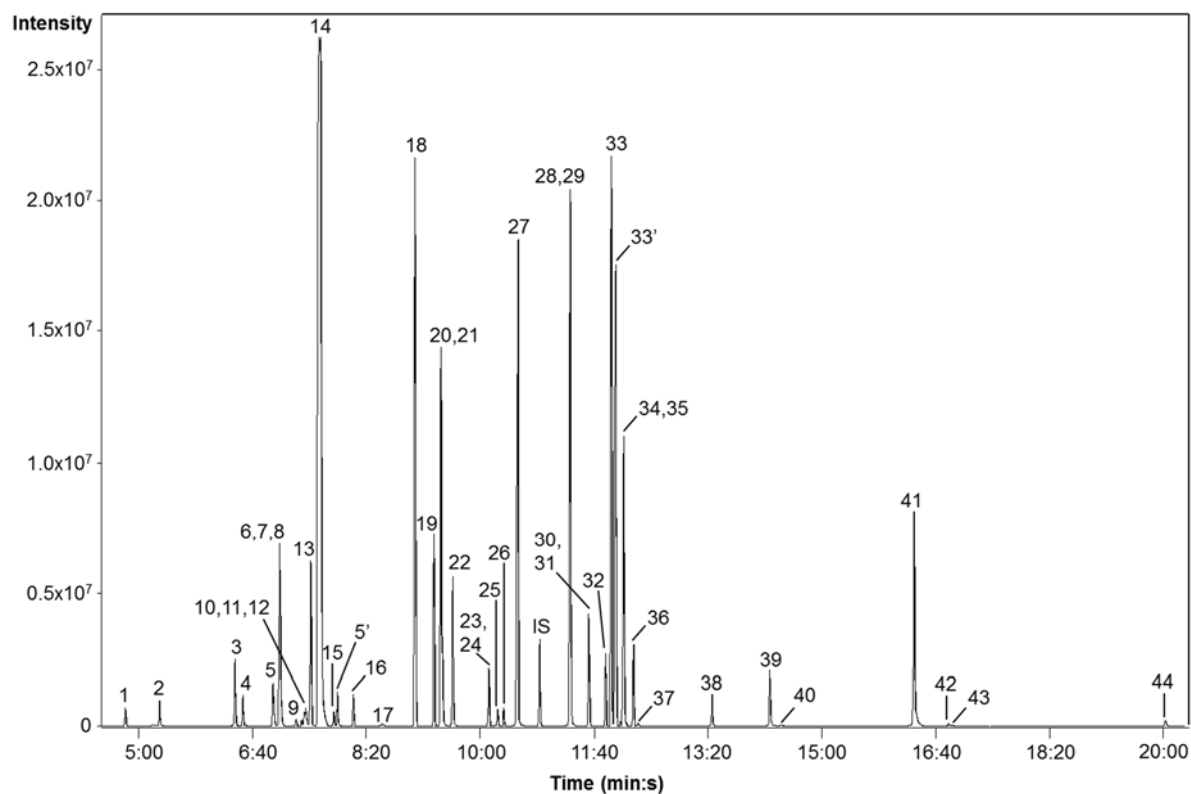

**Figure S6.** Selected ion chromatograms of hydrophilic metabolites extracted white flowers of *Magnolia denudata* as MO/TMS derivatives separated on a 30 m × 0.25 mm i.d. fused silica capillary column coated with 0.25 μm CP-SIL 8 CB low bleed. The numbers represent the same compounds as for Table 1.

**Table S1.** Metabolites identified in GC-TOFMS chromatograms of white flowers of *Magnolia denudate*.

| No. <sup>1)</sup> | Compound                    | RT <sup>2)</sup> | RRT <sup>3)</sup> | Selected ion for quantification <sup>4)</sup> |
|-------------------|-----------------------------|------------------|-------------------|-----------------------------------------------|
| 1                 | Lactic acid                 | 4.810            | 0.443             | 147                                           |
| 2                 | Alanine                     | 5.310            | 0.489             | 146                                           |
| 3                 | Glycolic acid               | 6.413            | 0.590             | 147                                           |
| 4                 | Valine                      | 6.530            | 0.601             | 146                                           |
| 5                 | Serine                      | 6.973            | 0.641             | 116                                           |
| 6                 | Ethanolamine                | 7.053            | 0.649             | 174                                           |
| 7                 | Glycerol                    | 7.072            | 0.651             | 147                                           |
| 8                 | Leucine                     | 7.095            | 0.653             | 158                                           |
| 9                 | Isoleucine                  | 7.308            | 0.672             | 158                                           |
| 10                | Proline                     | 7.392            | 0.680             | 142                                           |
| 11                | Nicotinic acid              | 7.427            | 0.683             | 180                                           |
| 12                | Glycine                     | 7.452            | 0.686             | 174                                           |
| 13                | Succinic acid               | 7.525            | 0.692             | 147                                           |
| 14                | Glyceric acid               | 7.667            | 0.705             | 147                                           |
| 15                | Fumaric acid                | 7.865            | 0.724             | 245                                           |
| 16                | Threonine                   | 8.147            | 0.749             | 219                                           |
| 17                | $\beta$ -Alanine            | 8.570            | 0.788             | 174                                           |
| 18                | Malic acid                  | 9.050            | 0.833             | 147                                           |
| 19                | Aspartic acid               | 9.327            | 0.858             | 100                                           |
| 20                | Pyroglutamic acid           | 9.423            | 0.867             | 156                                           |
| 21                | 4-Aminobutyric acid         | 9.450            | 0.869             | 174                                           |
| 22                | Threonic acid               | 9.598            | 0.883             | 147                                           |
| 23                | Arginine                    | 10.097           | 0.929             | 142                                           |
| 24                | Glutamic acid               | 10.132           | 0.932             | 246                                           |
| 25                | Phenylalanine               | 10.262           | 0.944             | 218                                           |
| 26                | Xylose                      | 10.347           | 0.952             | 103                                           |
| 27                | Asparagine                  | 10.555           | 0.971             | 116                                           |
| 28                | Ribitol (Internal Standard) | 10.870           | 1.000             | 217                                           |
| IS                | Vanillic acid               | 11.290           | 1.039             | 297                                           |
| 29                | Glutamine                   | 11.322           | 1.042             | 156                                           |
| 30                | Shikimic acid               | 11.455           | 1.054             | 227                                           |
| 31                | Citric acid                 | 11.592           | 1.066             | 273                                           |
| 32                | Quinic acid                 | 11.842           | 1.089             | 345                                           |
| 33                | Fructose                    | 11.920           | 1.097             | 103                                           |
| 34                | Galactose                   | 12.067           | 1.110             | 147                                           |
| 35                | Glucose                     | 12.102           | 1.113             | 147                                           |
| 36                | Mannose                     | 12.245           | 1.126             | 147                                           |
| 37                | Mannitol                    | 12.315           | 1.133             | 319                                           |
| 38                | Inositol                    | 13.393           | 1.232             | 305                                           |
| 39                | Tryptophan                  | 14.242           | 1.310             | 202                                           |
| 40                | Sinapic acid                | 14.397           | 1.324             | 338                                           |
| 41                | Sucrose                     | 16.352           | 1.504             | 217                                           |
| 42                | Maltose                     | 16.860           | 1.551             | 147                                           |
| 43                | Trehalose                   | 16.913           | 1.556             | 191                                           |
| 44                | Raffinose                   | 20.032           | 1.843             | 217                                           |

<sup>1)</sup>Numbers represent the compound index for the chromatogram peaks shown in Figure S5.

<sup>2)</sup>Retention time (min). <sup>3)</sup>Relative retention time (retention time of the analyte/retention time of the IS).

<sup>4)</sup>Specific mass ion used for quantification.
